# Supplementary material for: Mechanically robust and highly bactericidal macroporous polymeric gels based on quaternized N,N-(dimethylamino)ethyl methacrylate possessing varying alkyl chain lengths
Source: Royal Society of Chemistry journal article supplement (doi:10.1039/d2tb02178a), 2023-01-01
Supplement: d2tb02178a1.pdf [file d2tb02178a1.pdf]

## Supporting Information

### Mechanically robust and highly bactericidal macroporous polymeric gels based on quaternized *N,N*-(dimethylamino)ethyl methacrylate possessing varying alkyl chain lengths

Amit Kumar,<sup>a</sup> Jyoti Sharma,<sup>b</sup> Preeti Srivastava,<sup>b</sup> Leena Nebhani<sup>a\*</sup>

<sup>a</sup> Department of Materials Science and Engineering, Indian Institute of Technology Delhi, Hauz Khas, New Delhi-110016, India

<sup>b</sup> Department of Biochemical Engineering and Biotechnology, Indian Institute of Technology Delhi, Hauz Khas, New Delhi-110016, India

Email: Preeti Srivastava (preeti@dbeb.iitd.ac.in), Leena Nebhani (Leena.Nebhani@mse.iitd.ac.in)

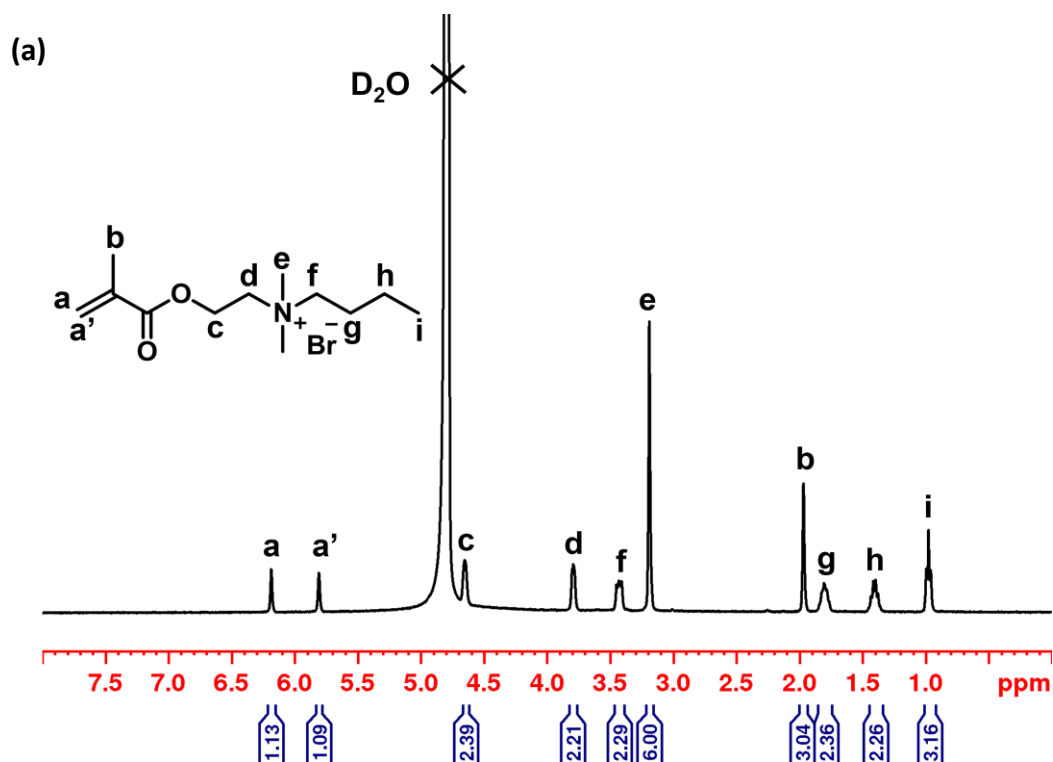

(b)

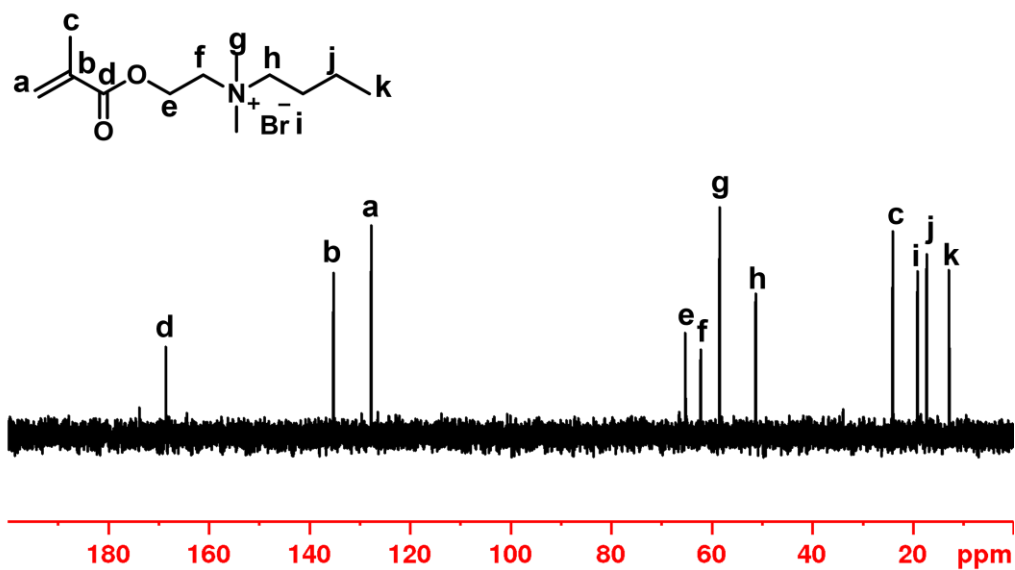

**Figure S1.** (a)  $^1\text{H}$  NMR and (b)  $^{13}\text{C}$  NMR were recorded for QA monomer bearing butyl chain in  $\text{D}_2\text{O}$  solvent.

(a)

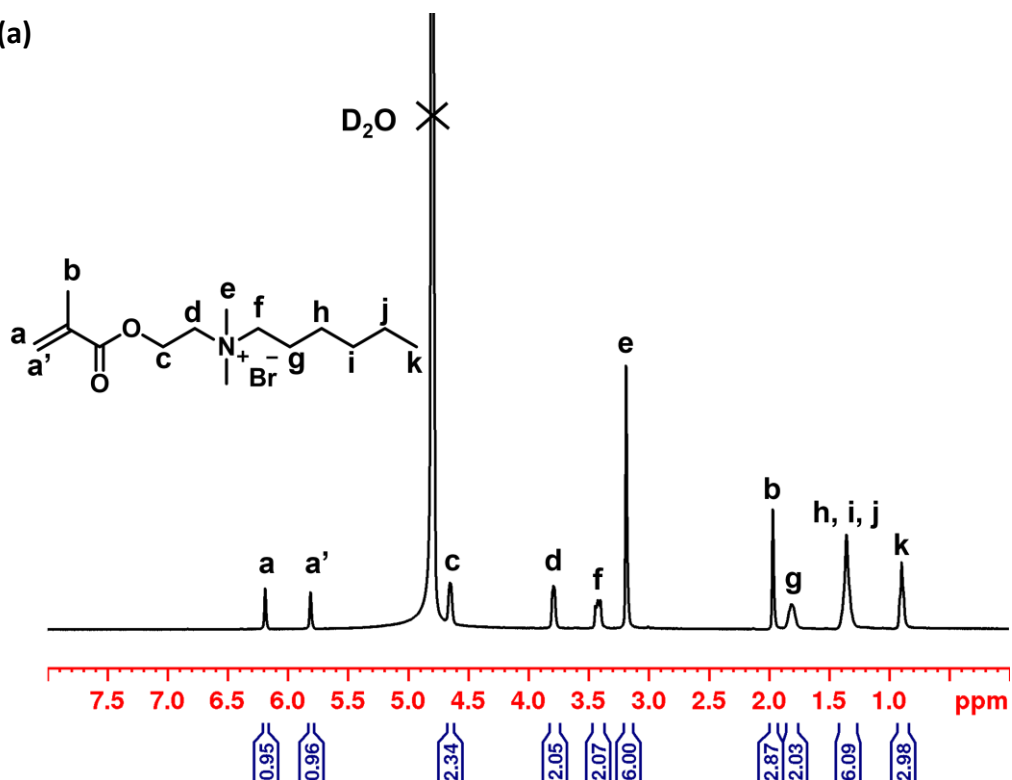

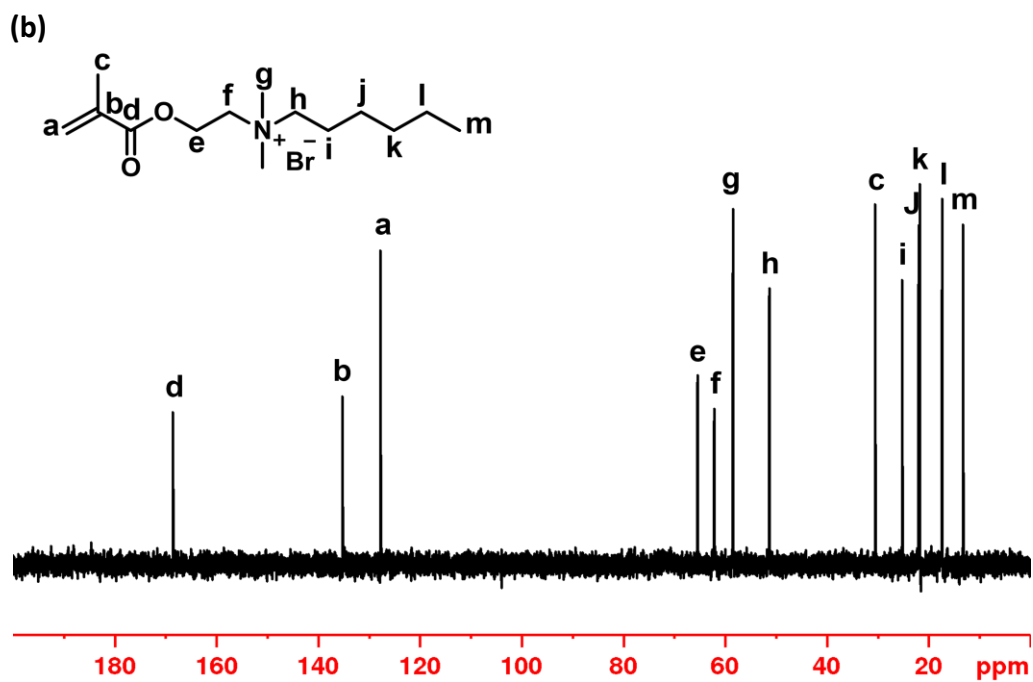

Figure S2. (a)  $^1\text{H}$  NMR and (b)  $^{13}\text{C}$  NMR were recorded for QA monomer bearing hexyl chain in  $\text{D}_2\text{O}$  solvent.

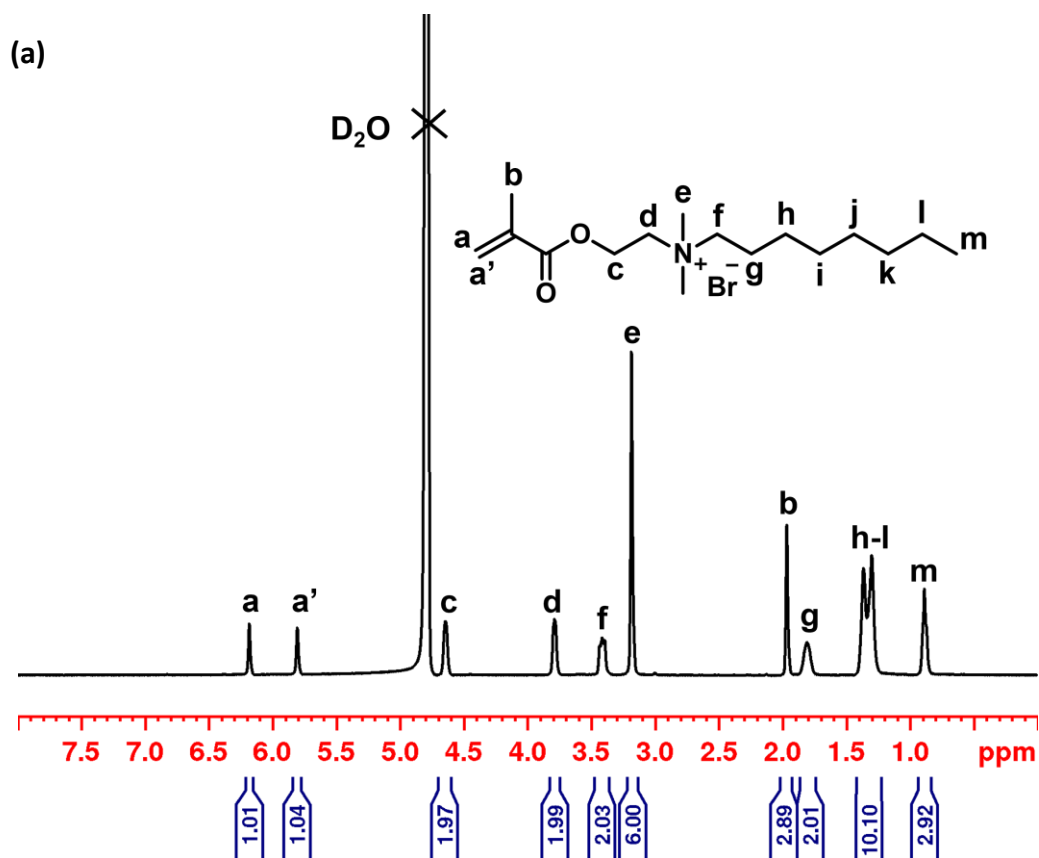

(b)

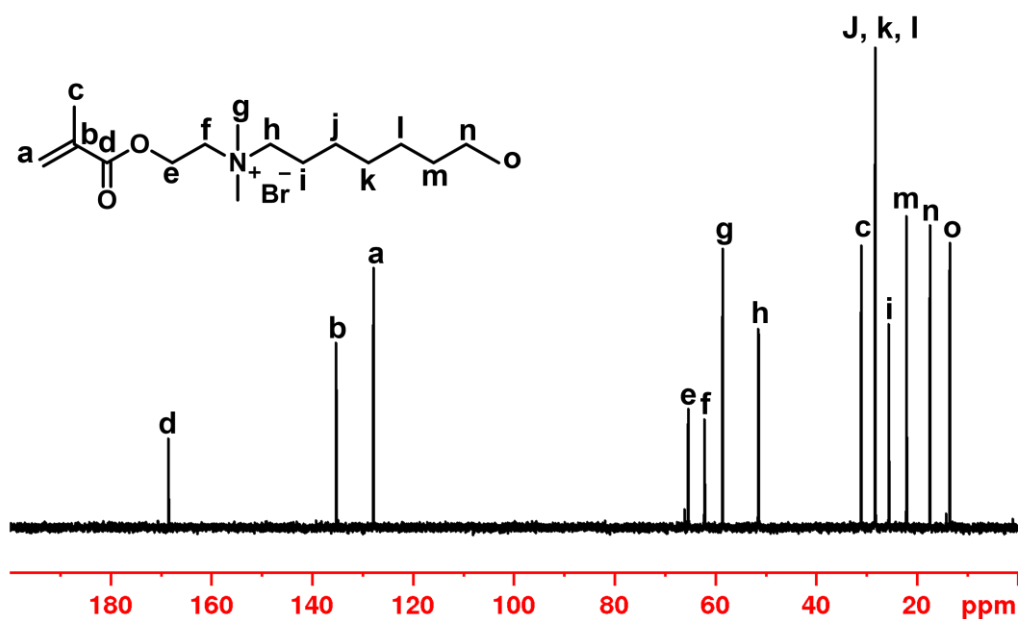

**Figure S3.** (a)  $^1\text{H}$  NMR and (b)  $^{13}\text{C}$  NMR were recorded for QA monomer bearing octyl chain in  $\text{D}_2\text{O}$  solvent.

**Table S1.** Composition of various MAPG containing different QA monomers as well as crosslinker amount.

| Specimen designation | Monomer (mmol) | Crosslinker (eq.) | Initiator ( $\mu\text{mol}$ ) | PMDETA ( $\mu\text{mol}$ ) |
|----------------------|----------------|-------------------|-------------------------------|----------------------------|
| C4-2.5               | 1.7            | 2.5               | 34                            | 68                         |
| C4-5                 | 1.7            | 5.0               | 34                            | 68                         |
| C4-10                | 1.7            | 10                | 34                            | 68                         |
| C4-15                | 1.7            | 15                | 34                            | 68                         |
| C6-2.5               | 1.7            | 2.5               | 34                            | 68                         |
| C6-5                 | 1.7            | 5.0               | 34                            | 68                         |
| C6-10                | 1.7            | 10                | 34                            | 68                         |
| C6-15                | 1.7            | 15                | 34                            | 68                         |
| C8-2.5               | 1.7            | 2.5               | 34                            | 68                         |
| C8-5                 | 1.7            | 5.0               | 34                            | 68                         |
| C8-10                | 1.7            | 10                | 34                            | 68                         |
| C8-15                | 1.7            | 15                | 34                            | 68                         |
| Nme2-2.5             | 1.7            | 2.5               | 34                            | 68                         |
| Nme2-5               | 1.7            | 5.0               | 34                            | 68                         |
| Nme2-10              | 1.7            | 10                | 34                            | 68                         |
| Nme2-15              | 1.7            | 15                | 34                            | 68                         |

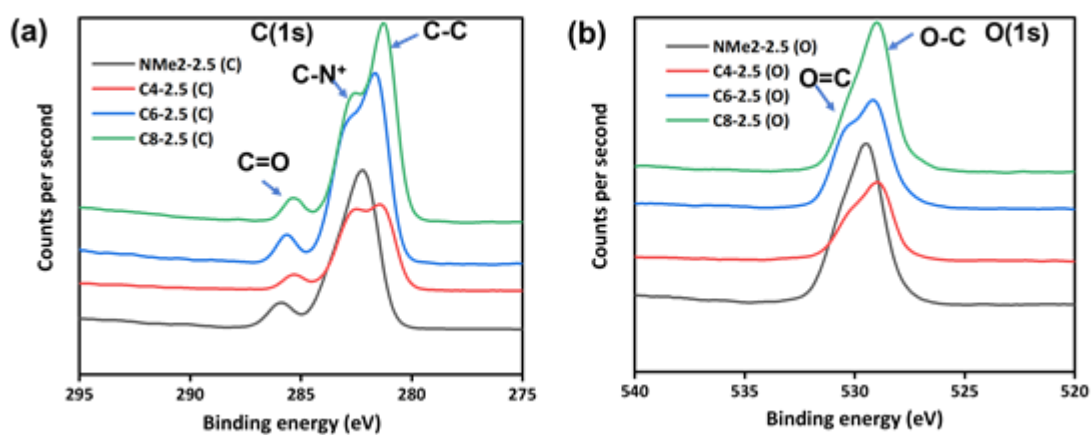

**Figure S4.** High resolution XPS of NMe2-2.5, C4-2.5, C6-2.5, and C8-2.5 gel samples (c) C(1s) (d) O(1s).

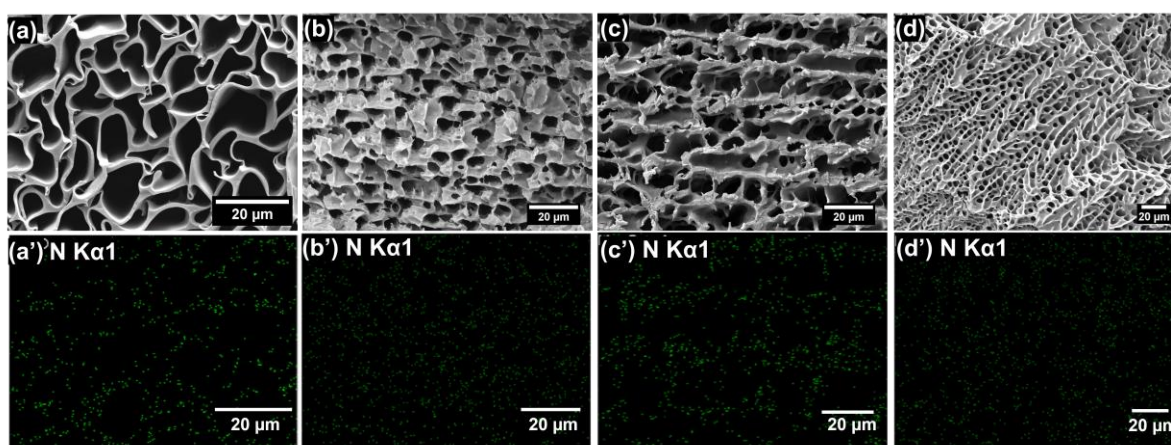

**Figure S5.** SEM micrographs and nitrogen mapping from EDX of MAPG (a,a') NMe2 having 2.5 eq. crosslinker (b,b') NMe2 having 5 eq. crosslinker (c,c') NMe2 having 10 eq. crosslinker (d,d') NMe2 having 15 eq. crosslinker.

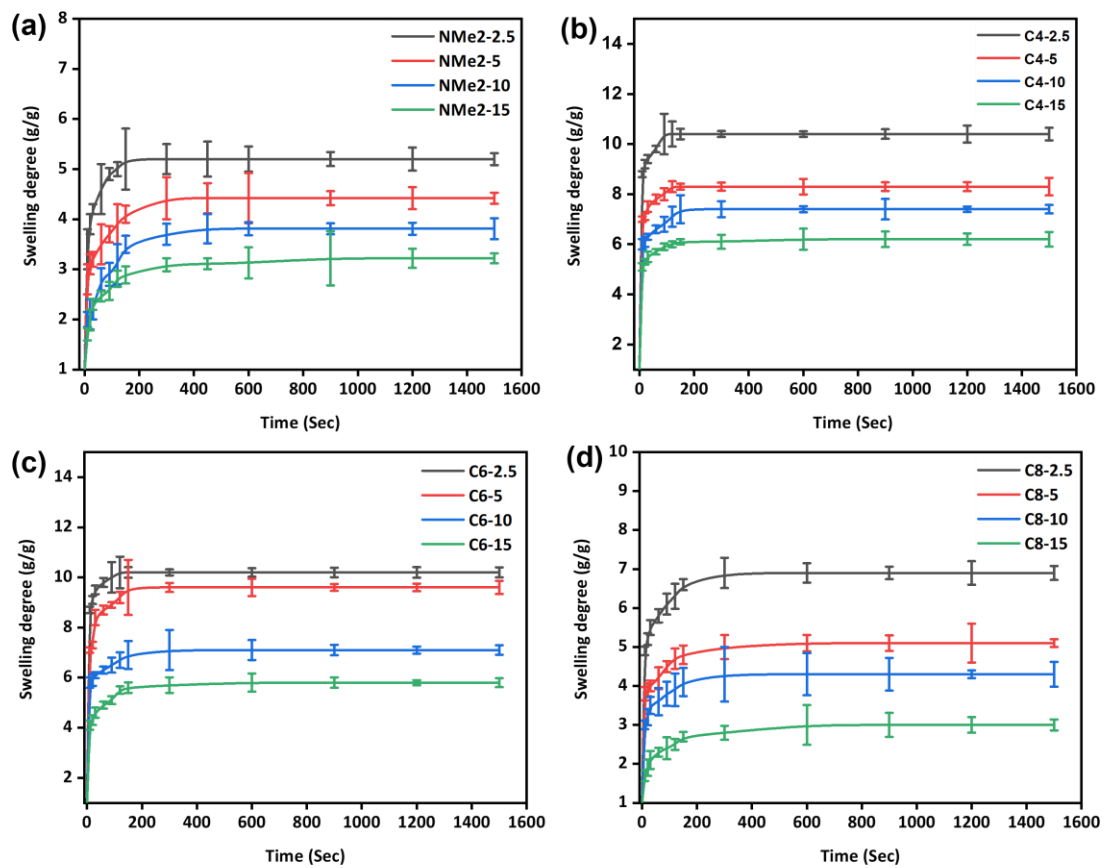

**Figure S6.** Swelling degree versus time for MAPG (a) NMe2 (2.5 eq., 5 eq., 10 eq., 15 eq.) (b) C4 (2.5 eq., 5eq., 10eq., 15 eq.) (c) C6 (2.5 eq., 5eq., 10eq., 15 eq.) (d) C8 (2.5 eq., 5eq., 10 eq., 15 eq.).

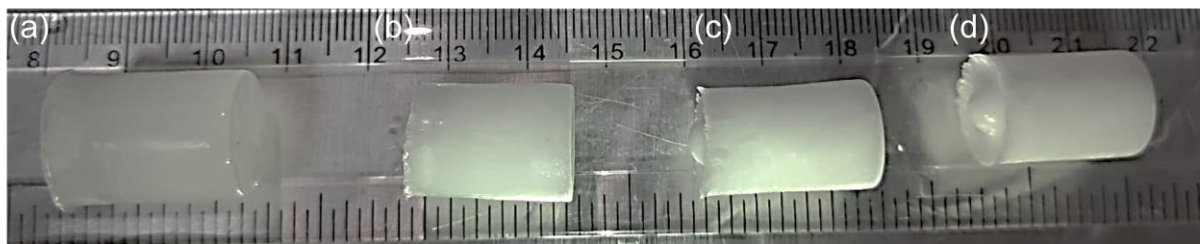

**Figure S7.** Swollen MAPG based on NMe2 (a) 2.5 eq. (b) 5 eq. (c) 10 eq. (g) 15 eq.

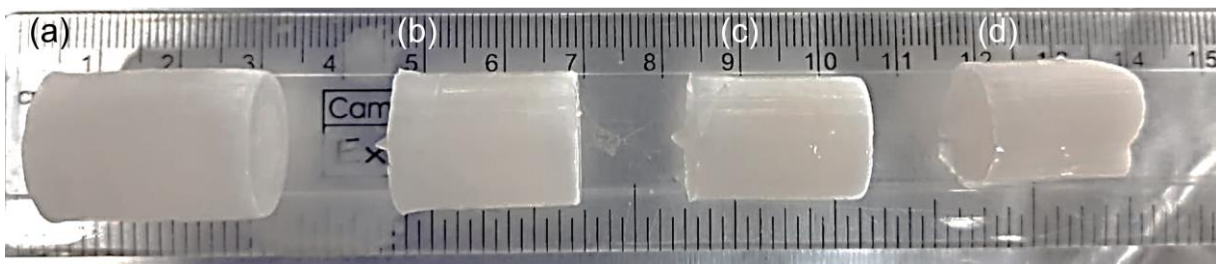

**Figure S8.** Swollen MAPG based on C4 (a) 2.5 eq. (b) 5 eq. (c) 10 eq. (g) 15 eq.

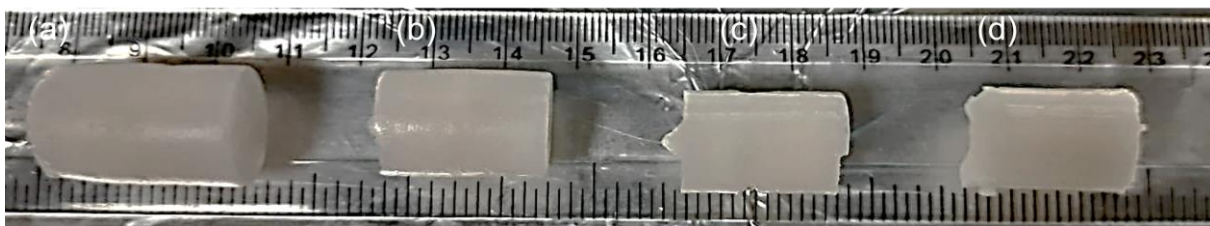

**Figure S9.** Swollen MAPG based on C6 (a) 2.5 eq. (b) 5 eq. (c) 10 eq. (g) 15 eq.

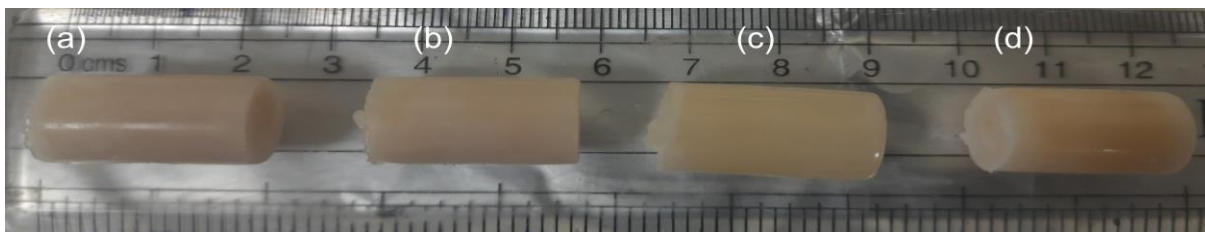

**Figure S10.** Swollen MAPG based on C8 (a) 2.5 eq. (b) 5 eq. (c) 10 eq. (g) 15 eq.

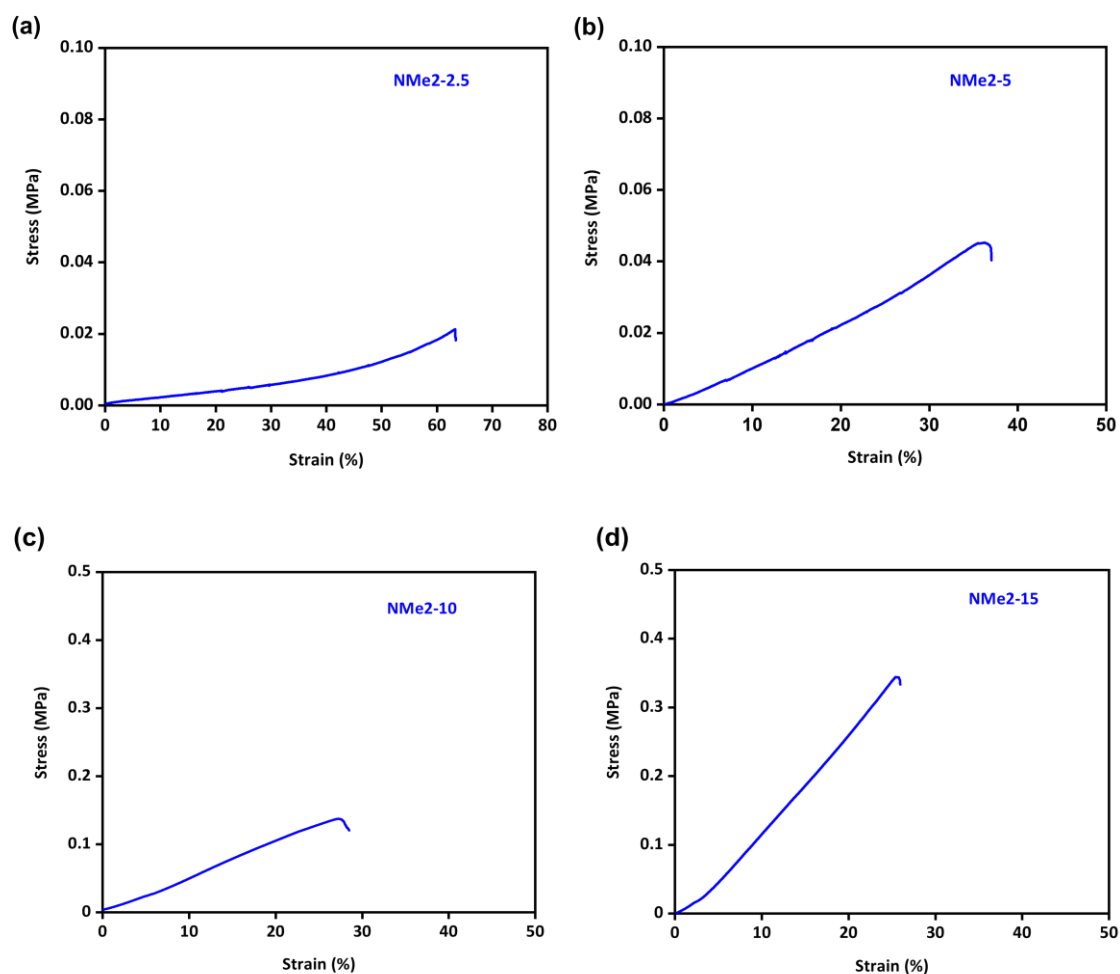

**Figure S11.** Stress vs strain curve of the NMe2 based MAPGs during the mechanical compression test. (a) NMe2-2.5 eq. (b) NMe2-5 eq. (c) NMe2-10 eq. (d) NMe2-15 eq.

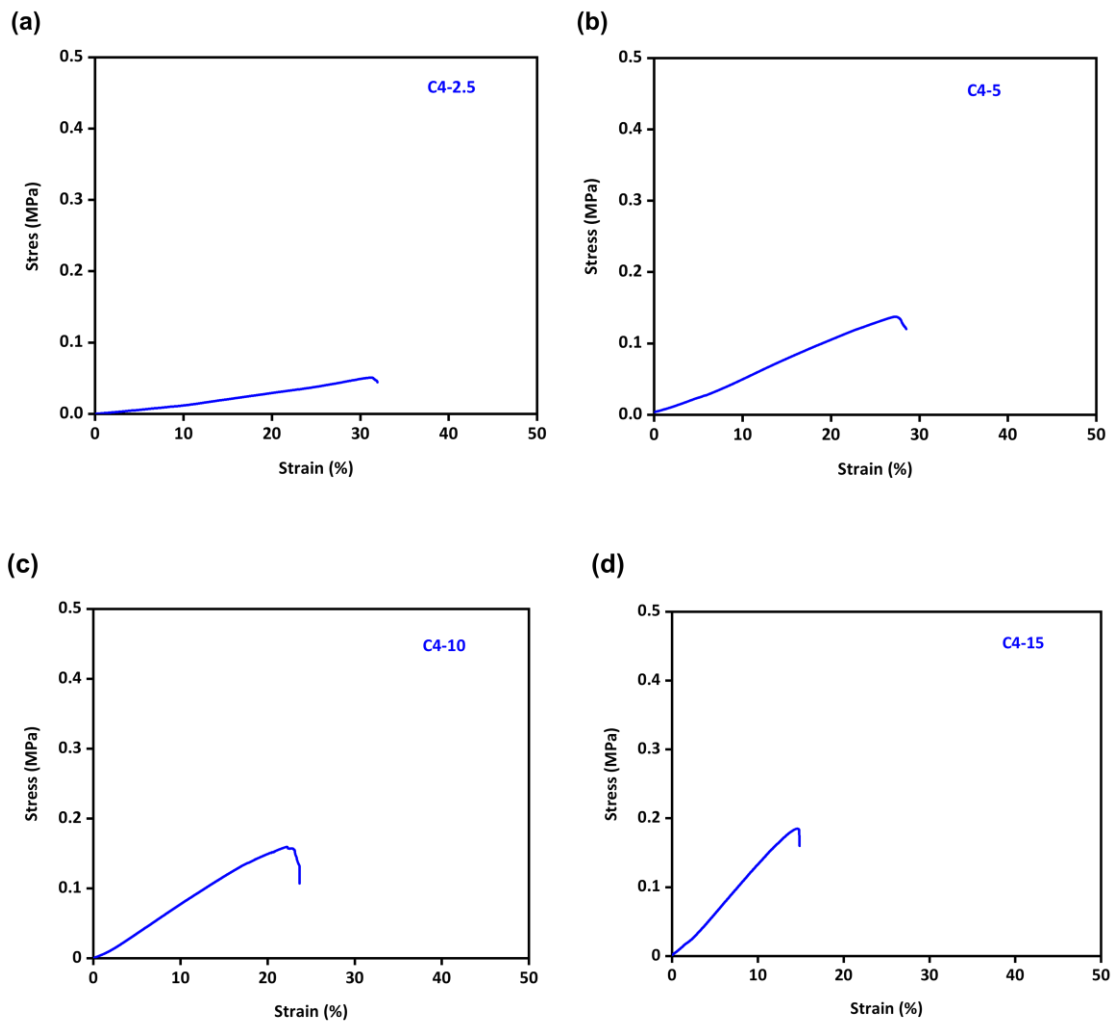

**Figure S12.** Stress vs strain curve of the C4-based MAPGs during the mechanical compression test. (a) C4-2.5 eq. (b) C4-5 eq. (c) C4-10 eq. (d) C4-15 eq.

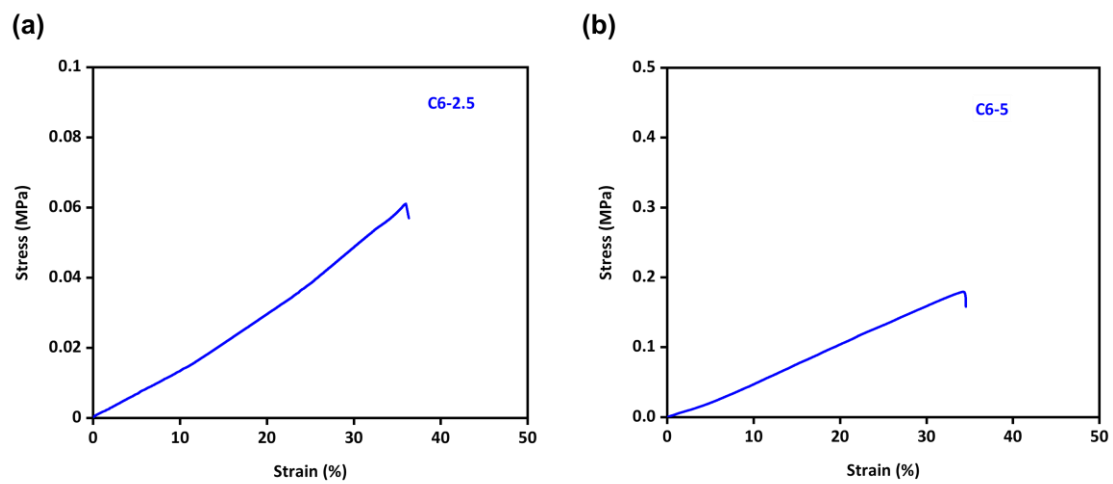



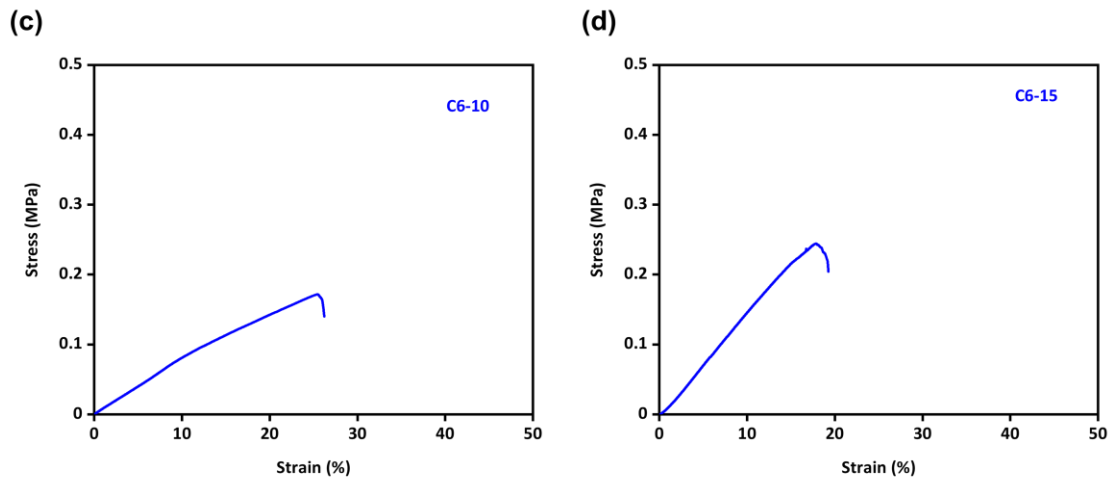

**Figure S13.** Stress vs strain curve of the C6-based MAPGs during the mechanical compression test, (a) C6-2.5 eq. (b) C6-5 eq. (c) C6-10 eq. (d) C6-15 eq.

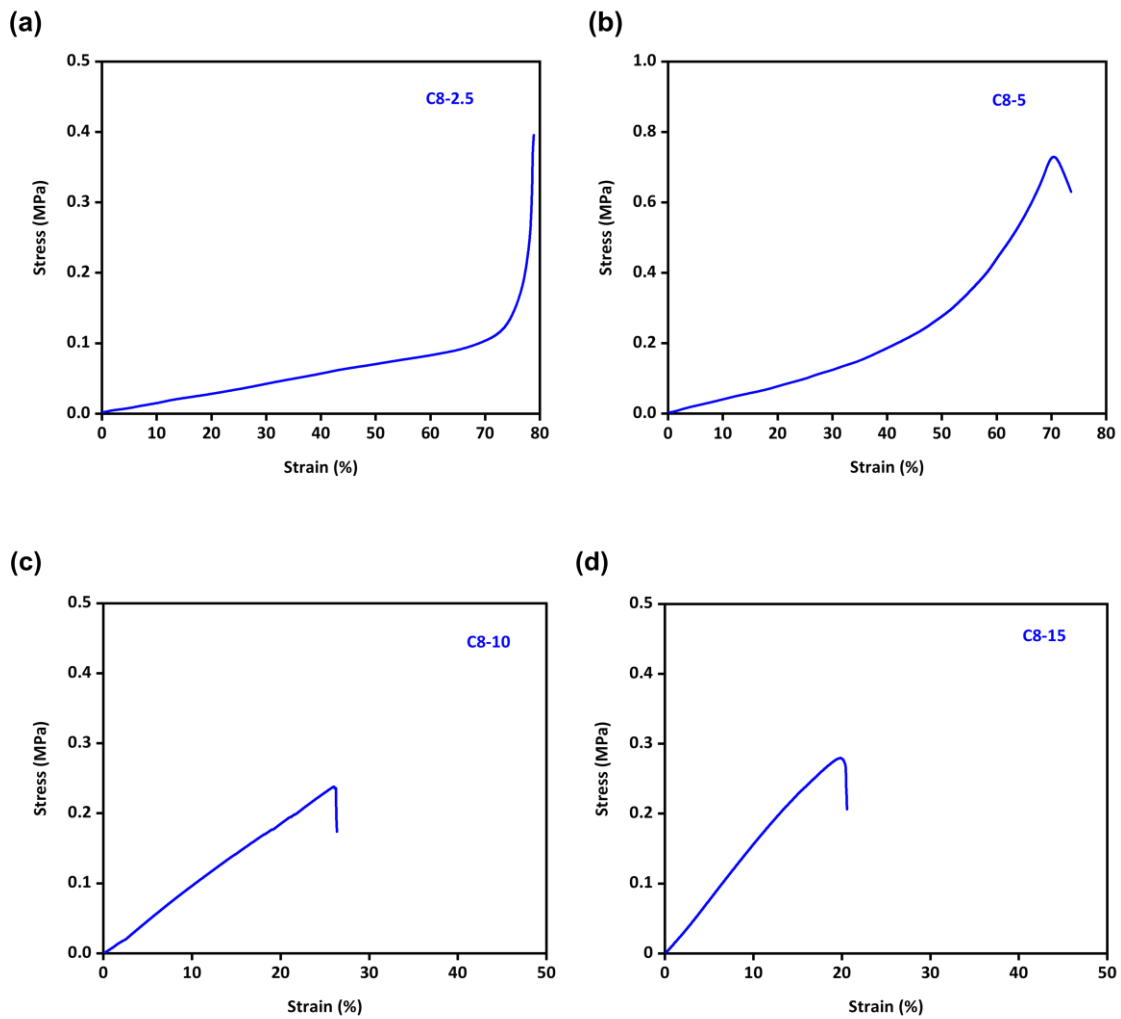

**Figure S14.** Stress vs strain curve of the C8-based MAPGs during the mechanical compression test. (a) C8-2.5 eq. (b) C8-5 eq. (c) C8-10 eq. (d) C8-15 eq.

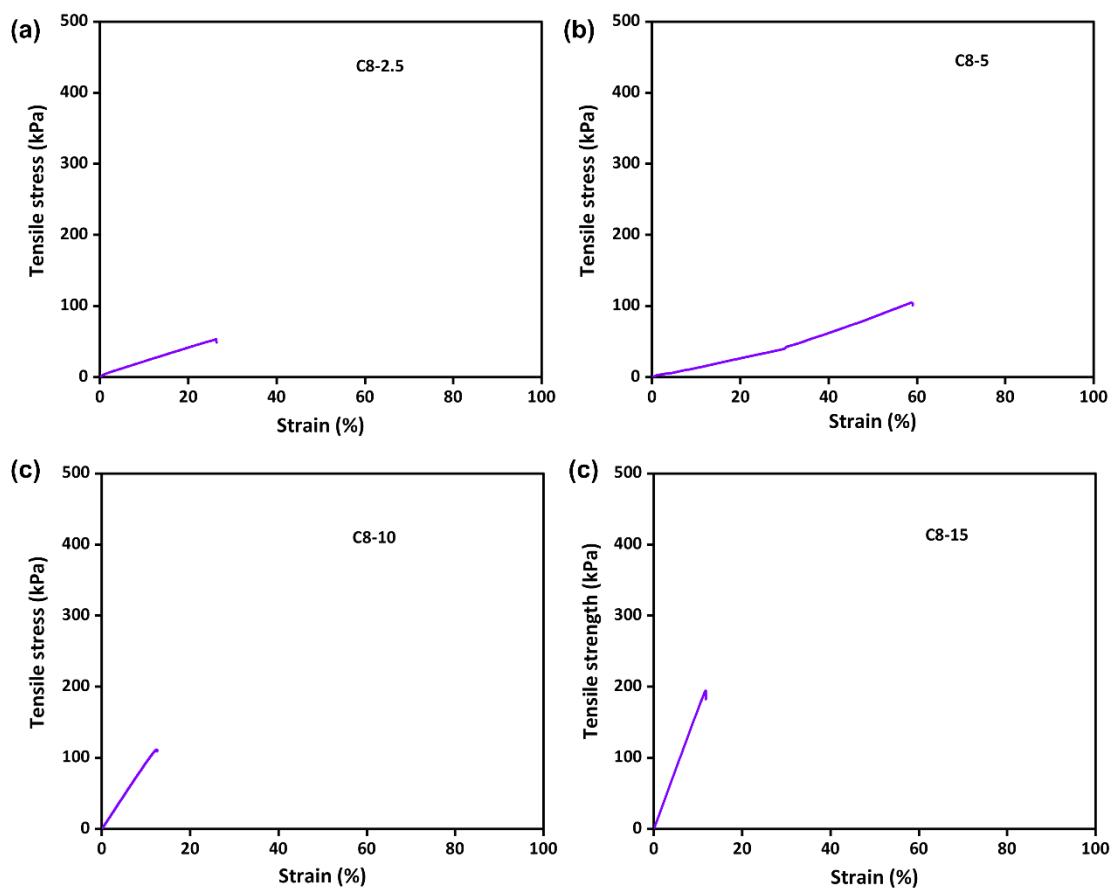

**Figure S15.** Tensile stress vs strain curve of the C8-based MAPGs during the tensile testing (a) C8-2.5 eq. (b) C8-5 eq. (c) C8-10 eq. (d) C8-15 eq.

**Table S2.** Experimental parameters for mechanical compression testing of gels.

| Gel composition | Maximum force (kPa) | Strain at maximum force (%) | E (kPa)   |
|-----------------|---------------------|-----------------------------|-----------|
| NMe2-2.5        | 21                  | 63                          | 19.6 ± 11 |
| NMe2-5          | 45                  | 36                          | 99.1 ± 42 |
| NMe2-10         | 136                 | 27                          | 388 ± 40  |
| NMe2-15         | 343                 | 25                          | 736 ± 84  |
| C4-2.5          | 51                  | 31                          | 118 ± 24  |
| C4-5            | 135                 | 27                          | 401 ± 44  |
| C4-10           | 158                 | 22                          | 563 ± 74  |
| C4-15           | 185                 | 14                          | 1016 ± 68 |
| C6-2.5          | 60                  | 35                          | 131 ± 19  |
| C6-5            | 178                 | 34                          | 434 ± 38  |
| C6-10           | 174                 | 25                          | 795 ± 22  |
| C6-15           | 243                 | 17                          | 1225 ± 81 |
| C8-2.5          | -                   | -                           | 142 ± 14  |

|       |     |    |           |
|-------|-----|----|-----------|
| C8-5  | 728 | 71 | 404 ± 58  |
| C8-10 | 237 | 26 | 832 ± 67  |
| C8-15 | 278 | 20 | 1446 ± 38 |

**Table S3.** Experimental parameters for tensile testing of the C8 gels.

| <b>GEL</b> | <b>Maximum elongation<br/>(%)</b> | <b>Maximum tensile stress<br/>(kPa)</b> |
|------------|-----------------------------------|-----------------------------------------|
| C8-2.5     | 27 ± 4                            | 53 ± 7.2                                |
| C8-5       | 58 ± 6                            | 106 ± 4                                 |
| C8-10      | 12 ± 3                            | 118 ± 7                                 |
| 15         | 11 ± 2                            | 197 ± 12                                |
